# Supplementary material for: Rethinking Suicide in Rural Australia: A study Protocol for Examining and Applying Knowledge of the Social Determinants to Improve Prevention in Non-Indigenous Populations
Source: MDPI journal article supplement (doi:10.3390/ijerph16162944), 2019-08-16
Supplement: s1 [file s1]

Supplementary Table S1: Codebook for National Coronial Information System data

| SOCIODEMOGRAPHIC       |                                               |                                                    |  | CODE |
|------------------------|-----------------------------------------------|----------------------------------------------------|--|------|
| Sex                    | Male                                          |                                                    |  | 1    |
|                        | Female                                        |                                                    |  | 2    |
|                        | Unknown                                       |                                                    |  | 99   |
| Marital Status         | Married (incl. de facto)                      |                                                    |  | 1    |
|                        | Never married                                 |                                                    |  | 2    |
|                        | Separated                                     |                                                    |  | 3    |
|                        | Divorced                                      |                                                    |  | 4    |
|                        | Widowed                                       |                                                    |  | 5    |
|                        | Unknown                                       |                                                    |  | 99   |
| Employment Status      | Employed                                      |                                                    |  | 1    |
|                        | Unemployed                                    |                                                    |  | 2    |
|                        | Student                                       |                                                    |  | 3    |
|                        | Retired/ [Disability] Pensioner               |                                                    |  | 4    |
|                        | Home duties                                   |                                                    |  | 5    |
|                        | Prisoner                                      |                                                    |  | 6    |
|                        | Other                                         |                                                    |  | 98   |
|                        | Unknown                                       |                                                    |  | 99   |
| Indigenous Status      | Neither Aboriginal nor Torres Strait Islander |                                                    |  | 0    |
|                        | Aboriginal and/or Torres Strait Islander      |                                                    |  | 1    |
|                        | Unknown                                       |                                                    |  | 99   |
| CIRCUMSTANCES OF DEATH |                                               |                                                    |  | CODE |
| Incident Location      | Home                                          | Unspecified Type of Home                           |  | 1    |
|                        |                                               | Detached house                                     |  | 2    |
|                        |                                               | Flat, Apartment, Terrace House                     |  | 3    |
|                        |                                               | Farmhouse                                          |  | 4    |
|                        |                                               | Residential Caravan, Mobile Houseboat              |  | 5    |
|                        |                                               | Granny flat, Bungalow                              |  | 6    |
|                        |                                               | Boarding house, Hostel                             |  | 7    |
|                        |                                               | Hut, Shanty, Humpy                                 |  | 8    |
|                        | Industrial or Construction Area               | Other Specified Commercial Area (Non-Recreational) |  | 10   |
|                        |                                               | Grain silo, Storage                                |  | 11   |
|                        |                                               | Construction Site                                  |  | 12   |
|                        |                                               | Factory, Plant                                     |  | 13   |
|                        |                                               | Shearing Shed                                      |  | 14   |
|                        |                                               | Mine and Quarry                                    |  | 15   |
|                        | Commercial Area                               | Unspecified                                        |  | 20   |

|  |                                                    |                                                                 |  |    |
|--|----------------------------------------------------|-----------------------------------------------------------------|--|----|
|  |                                                    | Motel, Hotel                                                    |  | 21 |
|  |                                                    | Shop, Store                                                     |  | 22 |
|  |                                                    | Storage Facility                                                |  | 23 |
|  |                                                    | Café, Pub                                                       |  | 24 |
|  |                                                    | Commercial Garage                                               |  | 25 |
|  |                                                    | Office Building                                                 |  | 26 |
|  | Recreational Area/Cultural Area or Public Building | Other Specified Recreational, Cultural Area, or Public Building |  | 30 |
|  |                                                    | Holiday Park, Campground                                        |  | 31 |
|  |                                                    | Public Park                                                     |  | 32 |
|  |                                                    | Cemetery, Crematorium                                           |  | 33 |
|  |                                                    | Public Religious Place                                          |  | 34 |
|  |                                                    | Holiday Resort                                                  |  | 35 |
|  |                                                    | Off Road Park                                                   |  | 36 |
|  | School/Educational Area                            | Unspecified                                                     |  | 40 |
|  |                                                    | School, University                                              |  | 41 |
|  |                                                    | Student Accommodation                                           |  | 42 |
|  | Residential Institution Area                       | Unspecified                                                     |  | 50 |
|  |                                                    | Home for the Elderly, Retirement Village                        |  | 51 |
|  |                                                    | Police Station                                                  |  | 52 |
|  |                                                    | Prison, Youth Training or Detention Centre                      |  | 53 |
|  |                                                    | Military Institution                                            |  | 54 |
|  |                                                    | Residential Care Facility                                       |  | 55 |
|  |                                                    | Crisis Accommodation                                            |  | 56 |
|  | Medical Service Area                               | Unspecified                                                     |  | 60 |
|  |                                                    | Hospital                                                        |  | 61 |
|  |                                                    | Nursing Home                                                    |  | 62 |
|  | Countryside                                        | Unspecified Countryside                                         |  | 70 |
|  |                                                    | Forest, Bushland                                                |  | 71 |
|  |                                                    | Large Area of Water                                             |  | 72 |
|  |                                                    | Area of Still Water                                             |  | 73 |
|  |                                                    | Stream of Water                                                 |  | 74 |
|  |                                                    | Beach, Shore, Bank of a Body of Water                           |  | 75 |
|  |                                                    | Base of Precipice, Cliff                                        |  | 76 |
|  |                                                    | Lookout, Viewpoint                                              |  | 77 |
|  |                                                    | Remote or Undeveloped Place                                     |  | 78 |
|  | Farm or Other Place of Primary Production          | Unspecified Farm or Other Place of Primary Production           |  | 80 |
|  |                                                    | Paddock, Field                                                  |  | 81 |

|                       |                                              |                                                                                 |  |     |
|-----------------------|----------------------------------------------|---------------------------------------------------------------------------------|--|-----|
|                       |                                              | Area for Raising or Care of Animals                                             |  | 82  |
|                       |                                              | Area for Growing of Crops Combined with Raising/Care of Animals (Mixed Farming) |  | 83  |
|                       |                                              | Hobby Farm                                                                      |  | 84  |
|                       |                                              | Timber Plantation                                                               |  | 85  |
|                       |                                              | Area for Growing of Crops, Market Gardening, Horticulture                       |  | 86  |
|                       | Transport Area/Public Highway/Freeway        | Unspecified Public Highway, Road                                                |  | 90  |
|                       |                                              | Roadway (Plus) Highway, Freeway                                                 |  | 91  |
|                       |                                              | Bush Track, Dirt Road                                                           |  | 92  |
|                       |                                              | Footpath                                                                        |  | 93  |
|                       |                                              | Railway (Other Than Station)                                                    |  | 94  |
|                       |                                              | Public Transport Station/Facilities                                             |  | 95  |
|                       |                                              | Rest Area, Parking Bay (PLUS) Parking Area                                      |  | 96  |
|                       | Sports & Athletic Area                       | Other Specified Sports and Athletics Area                                       |  | 100 |
|                       |                                              | Sporting Grounds (Outdoor)                                                      |  | 101 |
|                       |                                              | Other Specified Facilities                                                      |  | 102 |
|                       | Other Places of Occurrence                   | Unspecified                                                                     |  | 110 |
|                       |                                              | Bridge                                                                          |  | 111 |
|                       |                                              | Land Vehicle                                                                    |  | 112 |
|                       |                                              | Wharf, Pier, Jetty                                                              |  | 113 |
|                       |                                              | Indigenous Community                                                            |  | 114 |
|                       | Other                                        |                                                                                 |  | 98  |
|                       | Unknown                                      |                                                                                 |  | 99  |
| <b>Death Location</b> | Incident Location                            |                                                                                 |  | 1   |
|                       | Medical Facility                             |                                                                                 |  | 2   |
|                       | Other Non-Incident Location                  |                                                                                 |  | 98  |
|                       | Unknown                                      |                                                                                 |  | 99  |
| <b>Method</b>         | Contact with Static Object (Jumping/Falling) |                                                                                 |  | 1   |
|                       | Contact with Fire or Flame                   |                                                                                 |  | 2   |
|                       | Drowning                                     |                                                                                 |  | 3   |

|  |                                                                          |                                                    |  |    |
|--|--------------------------------------------------------------------------|----------------------------------------------------|--|----|
|  | Exposure to Electric Current                                             |                                                    |  | 4  |
|  | Hanging, Strangling                                                      |                                                    |  | 5  |
|  | Inhalation of Smoke                                                      |                                                    |  | 6  |
|  | Obstruction of Airway by Object Covering Mouth                           |                                                    |  | 7  |
|  | Puncture, Stabbing, Cutting, Severing                                    |                                                    |  | 8  |
|  | Self-Immolation                                                          |                                                    |  | 9  |
|  | Poisoning by Multiple Substances                                         | Alcohol and Antidepressants                        |  | 10 |
|  |                                                                          | Alcohol and Amphetamines                           |  | 11 |
|  |                                                                          | Alcohol and Analgesics                             |  | 12 |
|  |                                                                          | Alcohol and Benzodiazepines                        |  | 13 |
|  |                                                                          | Alcohol and Cannabis                               |  | 14 |
|  |                                                                          | Alcohol and Opiates                                |  | 15 |
|  |                                                                          | Amphetamines and Antidepressants                   |  | 16 |
|  |                                                                          | Amphetamines and Opiates                           |  | 17 |
|  |                                                                          | Analgesics                                         |  | 18 |
|  |                                                                          | Antidepressants                                    |  | 19 |
|  |                                                                          | Antidepressants and Analgesics                     |  | 20 |
|  |                                                                          | Antidepressants and Benzodiazepines                |  | 21 |
|  |                                                                          | Antidepressants and Cannabis                       |  | 22 |
|  |                                                                          | Antidepressants and Opiates                        |  | 23 |
|  |                                                                          | Benzodiazepines and Analgesics                     |  | 24 |
|  |                                                                          | Benzodiazepines and Opiates                        |  | 25 |
|  |                                                                          | Benzodiazepines                                    |  | 26 |
|  |                                                                          | Other Specified or Unspecified Multiple Substances |  | 27 |
|  | Poisoning by Solid, Gaseous and Liquid Substance - <i>pharmaceutical</i> | Analgesic, Antipyretic, Antirheumatic              |  | 30 |
|  |                                                                          | Amphetamine                                        |  | 31 |
|  |                                                                          | Anticonvulsant                                     |  | 32 |
|  |                                                                          | Antidepressants                                    |  | 33 |

|                                                                   |                                                                              |                                                             |  |    |
|-------------------------------------------------------------------|------------------------------------------------------------------------------|-------------------------------------------------------------|--|----|
|                                                                   |                                                                              | Benzodiazepine                                              |  | 34 |
|                                                                   |                                                                              | Cardiovascular drug                                         |  | 35 |
|                                                                   |                                                                              | Insulin                                                     |  | 36 |
|                                                                   |                                                                              | Sedative, Hypnotic, Antipsychotic                           |  | 37 |
|                                                                   |                                                                              | Other Specified or Unspecified Pharmaceutical Substance     |  | 38 |
|                                                                   | Poisoning by Solid, Gaseous and Liquid Substance – <i>non-pharmaceutical</i> | Cleaning Agent                                              |  | 40 |
|                                                                   |                                                                              | Helium                                                      |  | 41 |
|                                                                   |                                                                              | LPG Gas, Natural Gas, Methane Gas, Propane Gas, Butane Gas  |  | 42 |
|                                                                   |                                                                              | Motor Vehicle Exhaust                                       |  | 43 |
|                                                                   |                                                                              | Nitrogen                                                    |  | 44 |
|                                                                   |                                                                              | Other Sources of Carbon Monoxide                            |  | 45 |
|                                                                   |                                                                              | Plant Food, Veterinary Product, Pesticide or Fertiliser     |  | 46 |
|                                                                   |                                                                              | Strychnine                                                  |  | 47 |
|                                                                   |                                                                              | Alcohol                                                     |  | 48 |
|                                                                   |                                                                              | Other Specified or Unspecified Non-pharmaceutical Substance |  | 49 |
|                                                                   | Shot by firearm                                                              | Handgun                                                     |  | 50 |
|                                                                   |                                                                              | Shotgun                                                     |  | 51 |
|                                                                   |                                                                              | Rifle                                                       |  | 52 |
|                                                                   |                                                                              | Other Unspecified Firearm                                   |  | 53 |
|                                                                   | Transport Injury - Pedestrian<br>Transport Injury – Vehicle Occupant         | Heavy Transport Vehicle                                     |  | 60 |
|                                                                   |                                                                              | Light Transport Vehicle                                     |  | 61 |
|                                                                   |                                                                              | Train                                                       |  | 62 |
|                                                                   |                                                                              | Other Specified or Unspecified Vehicle                      |  | 63 |
|                                                                   |                                                                              | Heavy Transport Vehicle                                     |  | 70 |
|                                                                   |                                                                              | Light Transport Vehicle                                     |  | 71 |
|                                                                   |                                                                              | Other Specified or Unspecified Vehicle                      |  | 72 |
|                                                                   | Other                                                                        |                                                             |  | 98 |
|                                                                   | Unknown                                                                      |                                                             |  | 99 |
| <b>Presence of Alcohol and/or Other drugs at Time of Incident</b> |                                                                              | No                                                          |  | 0  |
|                                                                   |                                                                              | Alcohol                                                     |  | 1  |
|                                                                   |                                                                              | Alcohol and Antidepressants                                 |  | 2  |

|                          |     |                                             |            |      |
|--------------------------|-----|---------------------------------------------|------------|------|
|                          |     | Alcohol and Amphetamines                    |            | 3    |
|                          |     | Alcohol and Analgesics                      |            | 4    |
|                          |     | Alcohol and Benzodiazepines                 |            | 5    |
|                          |     | Alcohol and Cannabis                        |            | 6    |
|                          |     | Alcohol and Opiates                         |            | 7    |
|                          |     | Amphetamines                                |            | 8    |
|                          |     | Amphetamines and Antidepressants            |            | 9    |
|                          |     | Amphetamine and Cannabis                    |            | 10   |
|                          |     | Analgesic, Antipyretic, Antirheumatic       |            | 11   |
|                          |     | Anticonvulsant                              |            | 12   |
|                          |     | Antidepressants                             |            | 13   |
|                          |     | Antidepressants and Analgesics              |            | 14   |
|                          |     | Antidepressants and benzodiazepines         |            | 15   |
|                          |     | Antidepressants and Cannabis                |            | 16   |
|                          |     | Antidepressants and Opiates                 |            | 17   |
|                          |     | Benzodiazepines                             |            | 18   |
|                          |     | Benzodiazepines and Opiates                 |            | 19   |
|                          |     | Benzodiazepines and Cannabis                |            | 20   |
|                          |     | Cannabis                                    |            | 21   |
|                          |     | Cannabis and Ecstasy                        |            | 22   |
|                          |     | Sedative, Hypnotic, Antipsychotic           |            | 23   |
|                          |     | Other Specified or Unspecified Substance(s) |            | 24   |
|                          |     | Other                                       |            | 98   |
|                          |     | Unknown                                     |            | 99   |
| HEALTH STATUS            |     |                                             |            | CODE |
| Diagnosed Mental Illness | No  |                                             |            | 0    |
|                          | Yes | Mood Disorder                               | Depression | 1    |
|                          |     |                                             | Bipolar    | 2    |
|                          |     | Anxiety Disorder                            |            | 3    |
|                          |     | Psychotic Disorder                          |            | 4    |
|                          |     | Eating Disorder                             |            | 5    |
|                          |     | Substance Abuse Disorder                    |            | 6    |
|                          |     | Personality Disorder                        |            | 7    |

|                                     |                                                 |                                    |  |    |
|-------------------------------------|-------------------------------------------------|------------------------------------|--|----|
|                                     |                                                 | Trauma-related disorder            |  | 8  |
|                                     |                                                 | Psychiatric Comorbidity            |  | 9  |
|                                     |                                                 | Suspected Mental Health Problem    |  | 10 |
|                                     |                                                 | Other                              |  | 98 |
|                                     |                                                 | Unknown                            |  | 99 |
| <b>Treatment</b>                    | No                                              |                                    |  | 0  |
|                                     | Yes                                             | Medication                         |  | 1  |
|                                     |                                                 | Psychotherapy/Counselling          |  | 2  |
|                                     |                                                 | Medication and Counselling/Therapy |  | 3  |
|                                     |                                                 | Other                              |  | 98 |
|                                     |                                                 | Unknown                            |  | 99 |
| <b>Reported Physical Illness</b>    | Injury/Disability                               | No                                 |  | 0  |
|                                     |                                                 | Yes                                |  | 1  |
|                                     |                                                 | Unknown                            |  | 99 |
|                                     | Cardiovascular Disease                          | No                                 |  | 0  |
|                                     |                                                 | Yes                                |  | 1  |
|                                     |                                                 | Unknown                            |  | 99 |
|                                     | Chronic Kidney Disease                          | No                                 |  | 0  |
|                                     |                                                 | Yes                                |  | 1  |
|                                     |                                                 | Unknown                            |  | 99 |
|                                     | Respiratory Disease                             | No                                 |  | 0  |
|                                     |                                                 | Yes                                |  | 1  |
|                                     |                                                 | Unknown                            |  | 99 |
|                                     | Musculoskeletal Conditions                      | No                                 |  | 0  |
|                                     |                                                 | Yes                                |  | 1  |
|                                     |                                                 | Unknown                            |  | 99 |
|                                     | Cancer                                          | No                                 |  | 0  |
|                                     |                                                 | Yes                                |  | 1  |
|                                     |                                                 | Unknown                            |  | 99 |
|                                     | Dementia                                        | No                                 |  | 0  |
|                                     |                                                 | Yes                                |  | 1  |
|                                     |                                                 | Unknown                            |  | 99 |
|                                     | Other                                           | No                                 |  | 0  |
|                                     |                                                 | Yes                                |  | 1  |
|                                     |                                                 | Unknown                            |  | 99 |
| <b>Contact with Health Services</b> | Community Treatment Order/Continuing care Order | No                                 |  | 0  |
|                                     |                                                 | Yes                                |  | 1  |
|                                     |                                                 | Unknown                            |  | 99 |
|                                     | Inpatient Mental Health                         | No                                 |  | 0  |
|                                     |                                                 | Yes                                |  | 1  |
|                                     |                                                 | Unknown                            |  | 99 |
|                                     | Proximity of Care Episode                       | None                               |  | 0  |
|                                     |                                                 | < 1 Week                           |  | 1  |
|                                     |                                                 | 1-6 Weeks                          |  | 2  |

|  |                           |                     |  |    |
|--|---------------------------|---------------------|--|----|
|  |                           | 6 Weeks to 6 Months |  | 3  |
|  |                           | 6 Months to 1 Year  |  | 4  |
|  |                           | >1 Year             |  | 5  |
|  |                           | Unknown             |  | 99 |
|  | Emergency Department      | No                  |  | 0  |
|  |                           | Yes                 |  | 1  |
|  |                           | Unknown             |  | 99 |
|  | Proximity of Care Episode | None                |  | 0  |
|  |                           | < 1 Week            |  | 1  |
|  |                           | 1-6 Weeks           |  | 2  |
|  |                           | 6 Weeks to 6 Months |  | 3  |
|  |                           | 6 Months to 1 Year  |  | 4  |
|  |                           | >1 Year             |  | 5  |
|  |                           | Unknown             |  | 99 |
|  | Psychiatrist/Psychologist | No                  |  | 0  |
|  |                           | Yes                 |  | 1  |
|  |                           | Unknown             |  | 99 |
|  | Proximity of Care Episode | None                |  | 0  |
|  |                           | < 1 Week            |  | 1  |
|  |                           | 1-6 Weeks           |  | 2  |
|  |                           | 6 Weeks to 6 Months |  | 3  |
|  |                           | 6 Months to 1 Year  |  | 4  |
|  |                           | >1 Year             |  | 5  |
|  |                           | Unknown             |  | 99 |
|  | Community Mental Health   | No                  |  | 0  |
|  |                           | Yes                 |  | 1  |
|  |                           | Unknown             |  | 99 |
|  | Proximity of Care Episode | None                |  | 0  |
|  |                           | < 1 Week            |  | 1  |
|  |                           | 1-6 Weeks           |  | 2  |
|  |                           | 6 Weeks to 6 Months |  | 3  |
|  |                           | 6 Months to 1 Year  |  | 4  |
|  |                           | >1 Year             |  | 5  |
|  |                           | Unknown             |  | 99 |
|  | Drug and Alcohol Services | No                  |  | 0  |
|  |                           | Yes                 |  | 1  |
|  |                           | Unknown             |  | 99 |
|  | Proximity of Care Episode | None                |  | 0  |
|  |                           | < 1 Week            |  | 1  |
|  |                           | 1-6 Weeks           |  | 2  |
|  |                           | 6 Weeks to 6 Months |  | 3  |
|  |                           | 6 Months to 1 Year  |  | 4  |
|  |                           | >1 Year             |  | 5  |
|  |                           | Unknown             |  | 99 |
|  | Primary Care              | No                  |  | 0  |
|  |                           | Yes                 |  | 1  |



|                                     |                                 |                     |  |    |
|-------------------------------------|---------------------------------|---------------------|--|----|
|                                     |                                 | Unknown             |  | 99 |
|                                     | Proximity of Care Episode       | None                |  | 0  |
|                                     |                                 | < 1 Week            |  | 1  |
|                                     |                                 | 1-6 Weeks           |  | 2  |
|                                     |                                 | 6 Weeks to 6 Months |  | 3  |
|                                     |                                 | 6 Months to 1 Year  |  | 4  |
|                                     |                                 | >1 Year             |  | 5  |
|                                     |                                 | Unknown             |  | 99 |
|                                     | Allied Health                   | No                  |  | 0  |
|                                     |                                 | Yes                 |  | 1  |
|                                     |                                 | Unknown             |  | 99 |
|                                     | Proximity of Care Episode       | None                |  | 0  |
|                                     |                                 | < 1 Week            |  | 1  |
|                                     |                                 | 1-6 Weeks           |  | 2  |
|                                     |                                 | 6 Weeks to 6 Months |  | 3  |
|                                     |                                 | 6 Months to 1 Year  |  | 4  |
|                                     |                                 | >1 Year             |  | 5  |
|                                     |                                 | Unknown             |  | 99 |
|                                     | Tertiary Care (Physical health) | No                  |  | 0  |
|                                     |                                 | Yes                 |  | 1  |
|                                     |                                 | Unknown             |  | 99 |
|                                     | Proximity of Care episode       | None                |  | 0  |
|                                     |                                 | < 1 Week            |  | 1  |
|                                     |                                 | 1-6 Weeks           |  | 2  |
|                                     |                                 | 6 Weeks to 6 Months |  | 3  |
|                                     |                                 | 6 Months to 1 Year  |  | 4  |
|                                     |                                 | >1 Year             |  | 5  |
|                                     |                                 | Unknown             |  | 99 |
|                                     | Palliative Care                 | No                  |  | 0  |
|                                     |                                 | Yes                 |  | 1  |
|                                     |                                 | Unknown             |  | 99 |
|                                     | Other                           | No                  |  | 0  |
|                                     |                                 | Yes                 |  | 1  |
|                                     |                                 | Unknown             |  | 99 |
| <b>Contact with Social Services</b> | Family and Community Services   | No                  |  | 0  |
|                                     |                                 | Yes                 |  | 1  |
|                                     |                                 | Unknown             |  | 99 |
|                                     | Centrelink [Social Security]    | No                  |  | 0  |
|                                     |                                 | Yes                 |  | 1  |
|                                     |                                 | Unknown             |  | 99 |
|                                     | Dept. of Veterans Affairs       | No                  |  | 0  |
|                                     |                                 | Yes                 |  | 1  |
|                                     |                                 | Unknown             |  | 99 |
|                                     | Criminal Justice                | No                  |  | 0  |
|                                     |                                 | Yes                 |  | 1  |
|                                     |                                 | Unknown             |  | 99 |

|                                                 |             |                                                        |  |      |
|-------------------------------------------------|-------------|--------------------------------------------------------|--|------|
|                                                 | Housing     | No                                                     |  | 0    |
|                                                 |             | Yes                                                    |  | 1    |
|                                                 |             | Unknown                                                |  | 99   |
|                                                 | Crisis Line | No                                                     |  | 0    |
|                                                 |             | Yes                                                    |  | 1    |
|                                                 |             | Unknown                                                |  | 99   |
|                                                 | Other       | No                                                     |  | 0    |
|                                                 |             | Yes                                                    |  | 1    |
|                                                 |             | Unknown                                                |  | 99   |
| SOCIOECONOMIC AND PSYCHOSOCIAL CIRCUMSTANCES    |             |                                                        |  | CODE |
| Problems Related to Employment and Unemployment |             | No                                                     |  | 0    |
|                                                 |             | Unemployment                                           |  | 1    |
|                                                 |             | Change of Job                                          |  | 2    |
|                                                 |             | Threat of Job Loss                                     |  | 3    |
|                                                 |             | Stressful Work Conditions                              |  | 4    |
|                                                 |             | Discord with Boss or Colleagues                        |  | 5    |
|                                                 |             | Sexual or Verbal Harassment/Bullying                   |  | 6    |
|                                                 |             | Injury/Workers Compensation                            |  | 7    |
|                                                 |             | Other/unspecified                                      |  | 98   |
|                                                 |             | Unknown                                                |  | 99   |
|                                                 |             | Problems Related to Housing and Economic Circumstances |  | No   |
| Low Income                                      |             |                                                        |  | 1    |
| Extreme Poverty                                 |             |                                                        |  | 2    |
| Insufficient Welfare Support                    |             |                                                        |  | 3    |
| Debt                                            |             |                                                        |  | 4    |
| Gambling                                        |             |                                                        |  | 5    |
| Inadequate Housing                              |             |                                                        |  | 6    |
| Homelessness                                    |             |                                                        |  | 7    |
| Housing Insecurity                              |             |                                                        |  | 8    |
| Discord with Neighbours, Lodgers, Landlord      |             |                                                        |  | 9    |
| Eviction                                        |             |                                                        |  | 10   |
| Other/unspecified                               |             |                                                        |  | 98   |
| Unknown                                         |             |                                                        |  | 99   |
| Problems Related to Social Environment          |             |                                                        |  | No   |
|                                                 |             | Problems of Adjustment to Life-cycle Transitions       |  | 1    |
|                                                 |             | Problems Related to Living Alone                       |  | 2    |

|                                                                                   |  |                                                            |                           |    |
|-----------------------------------------------------------------------------------|--|------------------------------------------------------------|---------------------------|----|
|                                                                                   |  | Acculturation Difficulty                                   |                           | 3  |
|                                                                                   |  | Social Exclusion and Rejection                             |                           | 4  |
|                                                                                   |  | Target of Perceived Adverse Discrimination and Persecution |                           | 5  |
|                                                                                   |  | Problems Related to Sexuality/Gender Identity              |                           | 6  |
|                                                                                   |  | Problems Related to Family Violence                        |                           | 7  |
|                                                                                   |  | Other/unspecified                                          |                           | 98 |
|                                                                                   |  | Unknown                                                    |                           | 99 |
| <b>Problems Related to Upbringing</b>                                             |  | No                                                         |                           | 0  |
|                                                                                   |  | Upbringing Away from Parents                               |                           | 1  |
|                                                                                   |  | Problems Related to Alleged Sexual Abuse                   |                           | 2  |
|                                                                                   |  | Problems Related to Alleged Physical Abuse                 |                           | 3  |
|                                                                                   |  | Parent-Child Conflict                                      |                           | 4  |
|                                                                                   |  | Parent-Child Estrangement                                  |                           | 5  |
|                                                                                   |  | Problems Related to Child Custody                          |                           | 6  |
|                                                                                   |  | Other/unspecified                                          |                           | 98 |
|                                                                                   |  | Unknown                                                    |                           | 99 |
| <b>Other Problems Related to Primary Support Group incl. Family Circumstances</b> |  | No                                                         |                           | 0  |
|                                                                                   |  | Problems in Relationship with Spouse or Partner            |                           | 1  |
|                                                                                   |  | Disruption of Family by Separation or Divorce              |                           | 2  |
|                                                                                   |  | Problems in Relationship with Children                     |                           | 3  |
|                                                                                   |  | Problems in Relationship with In-Laws                      |                           | 4  |
|                                                                                   |  | Death of Family Member or Friend                           | Non-suicide related death | 5  |
|                                                                                   |  |                                                            | Suicide related death     | 6  |
|                                                                                   |  | Dependent Relative or Friend Needing Care at Home          |                           | 7  |

|                                                               |  |                                                                       |  |    |
|---------------------------------------------------------------|--|-----------------------------------------------------------------------|--|----|
|                                                               |  | Alcoholism and Drug Use in the Family                                 |  | 8  |
|                                                               |  | Other/unspecified                                                     |  | 98 |
|                                                               |  | Unknown                                                               |  | 99 |
| <b>Problems Related to Education and Literacy</b>             |  | No                                                                    |  | 0  |
|                                                               |  | Educational Maladjustment and/or Discord with Teachers and Classmates |  | 1  |
|                                                               |  | Failed School Examinations                                            |  | 2  |
|                                                               |  | Underachievement                                                      |  | 3  |
|                                                               |  | Other/unspecified                                                     |  | 98 |
|                                                               |  | Unknown                                                               |  | 99 |
|                                                               |  |                                                                       |  |    |
| <b>Problems Related to Certain Psychosocial Circumstances</b> |  | No                                                                    |  | 0  |
|                                                               |  | Problems Related to Pregnancy                                         |  | 1  |
|                                                               |  | Problems Related to Multiparity                                       |  | 2  |
|                                                               |  | Ddiscord with Counsellors                                             |  | 3  |
|                                                               |  | Conviction in Civil or Criminal Proceedings                           |  | 4  |
|                                                               |  | Imprisonment and incarceration                                        |  | 5  |
|                                                               |  | Problems Related to Release from Prison                               |  | 6  |
|                                                               |  | Problems Related to Other Legal Circumstances                         |  | 7  |
|                                                               |  | Victim of Crime                                                       |  | 8  |
|                                                               |  | Problems Related to Addiction                                         |  | 9  |
|                                                               |  | Exposure to Disaster, War & Other Hostilities                         |  | 10 |
|                                                               |  | Other/unspecified                                                     |  | 98 |
|                                                               |  | Unknown                                                               |  | 99 |
|                                                               |  |                                                                       |  |    |
